# Supplementary material
Source: Springer Nature journal article supplement (https://www.springermedizin.de/resource/supplementary/12885_2010_2479_MOESM1_ESM.pdf/9461408)

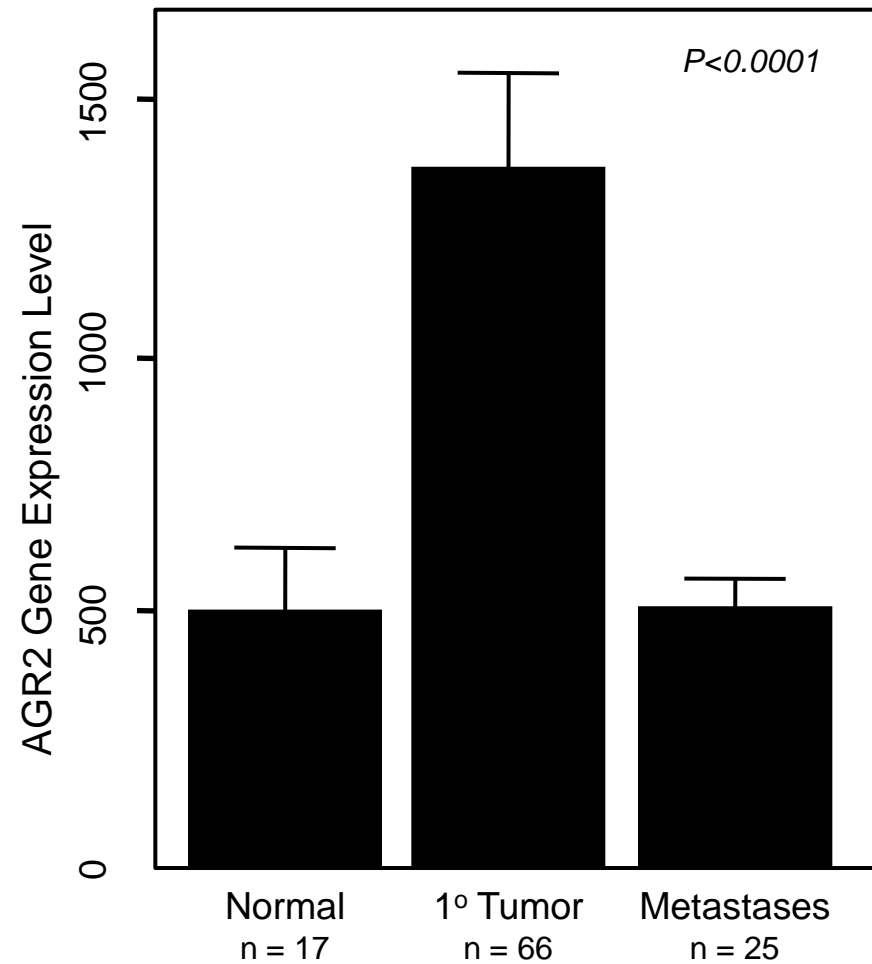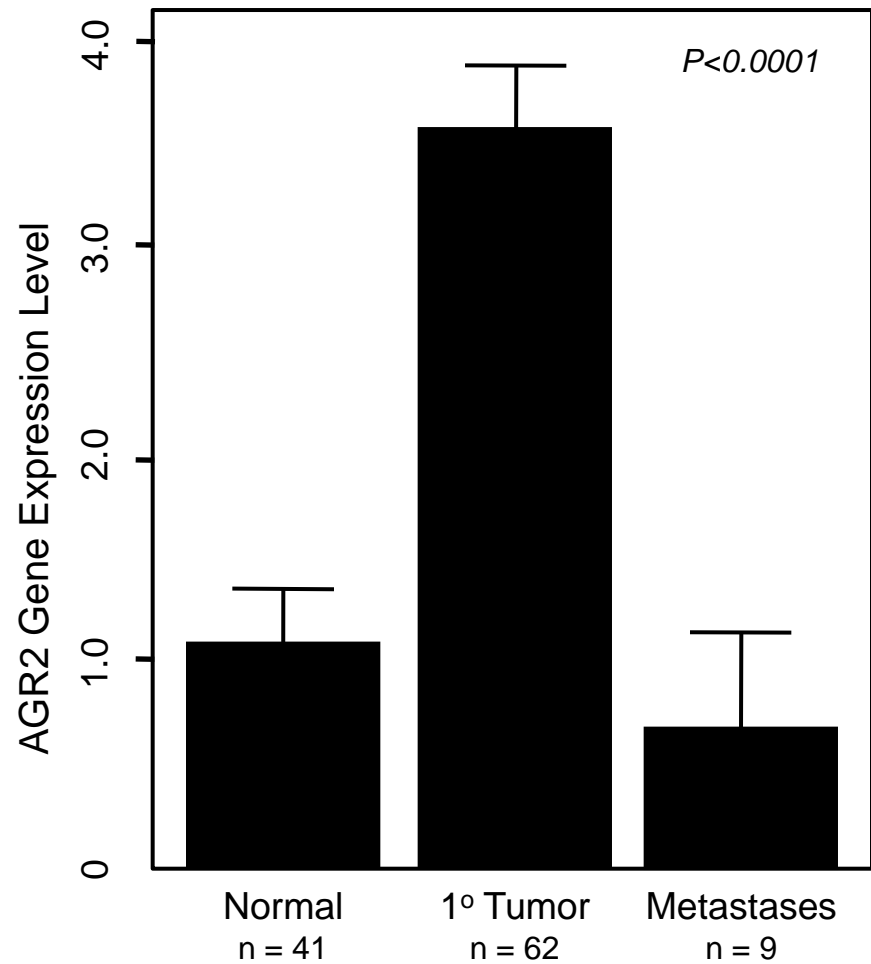

Supplement: MOESM1 [file 9461408]
